# **1 Selection signatures in worldwide Sheep populations**

2 Maria-Ines Fariello<sup>1</sup>, Bertrand Servin<sup>1</sup>, Gwenola Tosser-Klopp<sup>1</sup>, Rachel Rupp<sup>2</sup>, Carole Moreno<sup>2</sup>, Magali  
3 SanCristobal<sup>1</sup>, Simon Boitard<sup>3,4</sup>

4 **1 Laboratoire de Génétique Cellulaire, INRA, Castanet-Tolosan, France**

5 **2 Station d'Amélioration Génétique des Animaux, INRA, Castanet-Tolosan, France**

6 **3 Génétique Animale et Biologie Intégrative, INRA & AgroParisTech, Jouy-en-Josas,**  
7 **France**

8 **4 Origine, Structure et Evolution de la Biodiversité, Museum National d'Histoire**  
9 **Naturelle & EPHE & CNRS, Paris, France**

## Abstract

The diversity of populations in domestic species offer great opportunities to study genome response to selection. The recently published Sheep Hapmap dataset is a great example of characterization of the world wide genetic diversity in the Sheep. In this study, we re-analyzed the Sheep Hapmap dataset to identify selection signatures in worldwide Sheep populations. Compared to previous analyses, we make use of statistical methods that (i) take account of the hierarchical structure of sheep populations, (ii) make use of Linkage Disequilibrium information and (iii) focus specifically on either recent or older selection signatures. We show that this allows to pinpoint several new selection signatures in the sheep genome and to distinguish those related to modern breeding objectives and to earlier post-domestication constraints. The newly identified regions, together with the one previously identified, reveal the extensive genome response to selection on morphology, color and adaptation to new environments.

## Introduction

Domestication of animals and plants played a major role in human history. With the advance of high-throughput genotyping and sequencing technologies, the analysis of large datasets in domesticated species offer great opportunities to study genome evolution in response to phenotypic selection [1]. Sheep was the first grazing animal to be domesticated [2] in part due to its manageable size and an ability to adapt to different climates and poor nutrition diets. A large variety of breeds with distinct morphology, coat color or specialized production (meat, milk or wool) were subsequently shaped by artificial selection. Since the release of the 50K SNP array [3], it is now possible to scan the genetic diversity in Sheep in order to detect loci that have been involved in these various adaptative selection events. The Sheep HapMap dataset, which includes 50K genotypes for 3000 animals from 74 breeds with diverse world-wide origins, provides a considerable resource for deciphering the genetic bases of phenotype diversification in Sheep. In the first analysis of this data set [4], the authors looked for selection by computing a global  $F_{ST}$  among the 74 breeds at all SNPs in the genome. They identified 31 genomic regions with extreme differentiation between breeds, which included candidate genes related to coat pigmentation, skeletal morphology, body size, growth, and reproduction. Further studies took advantage of the Sheep HapMap resource to detect genetic variants associated with pigmentation [5], fat deposition [2], or microphthalmia disease [6]. An other study [7] performed a genome scan for selection focused on American synthetic breeds, using an

39  $F_{ST}$  approach similar to that in [4].

40 The 74 breeds of the Sheep HapMap dataset have a strong hierarchical structure, with at least 3  
41 distinct differentiation levels: an inter-continental level (e.g. European breeds vs Asian breeds), an intra-  
42 continental level (e.g. Texel vs Suffolk European breeds), and an intra-breed level (e.g. German Texel vs  
43 Scottish Texel flocks). Recent studies [8, 9] showed that, when applied to hierarchically structured data  
44 sets,  $F_{ST}$  based genome scans for selection may lead to a large proportion of false positives (neutral loci  
45 wrongly detected as under selection) and false negatives (undetected loci under selection). This statistical  
46 issue is also compounded by the heterogeneity of effective population size among breeds, implying that  
47 some breeds are more prone to contribute large locus-specific  $F_{ST}$  values than others [9]. Apart from  
48 these statistical considerations, merging populations with various degrees of shared ancestry can limit  
49 our understanding of the selective process at detected loci. Indeed, the regions pointed out in [4] can be  
50 related to either ancient selection, as the poll locus which has likely been selected for thousands of years,  
51 or fairly recent selection, as the myostatin locus which has been specifically selected in the Texel breed.  
52 But in most situations the time scale of adaptation can not be easily determined.

53 Another limit of genome scans for selection based on single SNP  $F_{ST}$  computations is that they do  
54 not sufficiently account for the very rich linkage disequilibrium information, even when the single SNP  
55 statistics are combined into windowed statistics. Recently, we proposed a new strategy to evaluate the  
56 haplotypic differentiation between populations [10]. We showed that using this approach greatly increases  
57 the detection power of selective sweeps from SNP chip data, and enables to detect also soft or incomplete  
58 sweeps. These latter selection scenarios are particularly relevant in the case of breeding populations,  
59 where selection objectives have likely varied along time and where the traits under selection are often  
60 polygenic.

61 In this study we provide a new genome scan for selection based on the Sheep HapMap data set,  
62 where we distinguish selective sweeps between and within 7 broad geographical groups. The within  
63 group analysis aims at detecting recent selection events related to the diversification of modern breeds.  
64 It is based on the single marker FLK test [9] and on its haplotypic extension [10], that both account for  
65 population size heterogeneity and for the hierarchical structure between populations. The between group  
66 analysis focuses on older selection events and is only based on FLK. Overall, we confirm 19 of the 31  
67 sweeps discovered in [4], while providing more details about the past selection process at these locus. We  
68 also identify 68 new regions under selection, with candidate genes related to coloration, morphology or

69 production traits.

## 70 **Results and discussion**

71 We detected selection signatures using methods that aim at identifying regions of outstanding genetic  
72 differentiation between populations, based either on single SNP, FLK [9], or haplotype, hapFLK [10],  
73 information. These methods have optimal power when working on closely related populations so we  
74 analyzed separately seven groups of breeds, previously identified as sharing recent common ancestry  
75 [4] and corresponding to geographical origins of breeds. Before performing genome scans for selection  
76 signatures, we studied the population structure of each group to identify outlier animals as well as admixed  
77 and strongly bottlenecked populations, using both PCA and model-based approaches [11, 12]. hapFLK  
78 was found robust to bottlenecks or moderate levels of admixture, but these phenomena may affect the  
79 detection power so we preferred to minimize their influence by removing suspect animals or populations.  
80 Details of these corrections are provided in the methods section. The final composition of populations  
81 groups are given in table S1.

## 82 **Overview of selected regions**

83 An overview of selection signatures on the genome across the different groups is plotted on Figure 1  
84 and Table 1 provides their detailed description. We found 40 selection signatures with hapFLK and 24  
85 with FLK, although we allowed a slightly higher false discovery rate for FLK than hapFLK (10% vs  
86 5%). This result is consistent with a higher power for hapFLK than FLK, as was shown before [10].  
87 Four regions are found with both the single SNP and the haplotype test and harbor strong functional  
88 candidate genes: NPR2, KIT, RXFP2 and EDN3 (see below). The overlap is thus small, illustrating  
89 that the two tests tend to capture different signals. In particular, hapFLK will fail to detect ancient  
90 selective sweeps where the mutation-carrying haplotype is small, and not associated with many SNPs on  
91 the chip. On the other hand, single SNP tests will fail to capture selective sweeps when a single SNP is  
92 not in high LD with the causal mutation. Six regions were detected in more than one group of breeds.  
93 They all contain strong candidate genes. Three of these genes are related to coat color (KIT, KITLG  
94 and MC1R), and could correspond to independent selection events (see discussion below). One region  
95 harbors a gene (RXFP2) for which polymorphisms have been shown to affect horn size and polledness

in the Soay [13] and Australian Merino [14]. The signatures of selection in this region exhibit different patterns among groups. The signal is very narrow in the SWE and SWA groups, and is in fact not detected by the hapFLK test, whereas it affects a large genomic region in the CEU group where it is detected by hapFLK. In the ITA group, the FLK statistics do not reach significance, and the hapFLK signal is not high (minimum  $q$ -value of 0.04). Together, the selection signatures suggest that selection on RXFP2, most likely due to selection on horn phenotypes, was carried out worldwide at different times and intensities. The last two regions harbor the HMGA2 gene, involved in selection for stature in dogs [15], and ABCG2, a strong QTL for milk production in cattle [16]. Populations selected for ABCG2 variants belong to different European regions (SWE, ITA and CEU).

In the paper presenting the sheephapmap dataset [4], 31 selection signatures were found, corresponding to the 0.1% highest single SNP  $F_{ST}$ . Using FLK and hapFLK, we confirm signatures of selection for 11 of these regions. Considering the two analyses were performed on the same dataset, this overlap can be considered as rather small. Two reasons can explain it.

First, the previous analysis was based on the  $F_{ST}$  statistic. Although this statistic is commonly used for selection scans, it is prone to produce false positives when the history of populations is characterized by population trees with unequal branch lengths (*i.e.* variation in the amount of drift experienced by different populations) [9]. In particular, strongly bottlenecked breeds will contribute high  $F_{ST}$  values preferentially, even under neutral evolution. With  $FLK$  and  $hapFLK$ , this varying amount of drift is accounted for, and populations with long branch lengths will not contribute to the signal more than others [10]. In fact they will tend to contribute less as it is harder to rule out the effect of drift alone in such populations.

Second, the previous analysis was performed using all breeds at the same time. It is therefore possible that some of these regions correspond to differentiation between groups of breeds rather than within groups. To investigate this question, we performed a genome scan for selection between the ancestors of the seven population groups using the FLK statistic computed on their estimated allele frequencies [9]. We did not include SNPs lying in regions detected within groups as selection biases their estimated ancestral allele frequencies. The population tree was reconstructed using SNPs for which we have unambiguous ancestral allele information (Figure 2). The tree is decomposed into two main lineages, one for European breeds and one for Asian and African breeds. The African group exhibits a slightly higher branch length. We note however that this could be due to ascertainment bias of SNPs on the SNP array.

126 This led to the identification of 23 new selection signatures (figure 3 and table 2), 9 of them being  
127 common to the previous analysis. Overall, we fail to replicate with this analysis 12 of the regions in [4].

## 128 Selection Signatures within population groups

129 **Coloration** Many selection signatures are located around genes that have been shown to be involved  
130 in hair, eye or skin color. In particular many genes underlying selection signatures are involved in the  
131 development and migration of melanocyte and in pigmentation: EDN3, KIT, KITLG, MC1R and MITF.  
132 We can add to this list SOX10 and ASIP that show some evidence of selection: in the ITA group, the  
133 q-value of hapFLK near SOX10 is 6.2%, while the closest SNP to ASIP (s66432 and s12884) present  
134 suggestive FLK p-values of respectively  $7.5 \cdot 10^{-4}$  and  $6.8 \cdot 10^{-5}$  in the ASI group, and is significantly  
135 differentiated between the ancestral groups. All these genes have previously been reported as being likely  
136 selection targets and/or associated to color patterns in different mammalian species. Finally we found  
137 a signal for selection around the BNC2 gene, that has recently been associated with skin pigmentation  
138 in Humans [17]. All population groups present at least a selection signature on one of these genes,  
139 reflecting the widespread importance of color patterns to define sheep breeds. Inferring a precise history  
140 of underlying causal mutations for color patterns in this dataset is hard for several reasons: the precise  
141 phenotypic characterizations of coat color patterns in the SheepHapMap breeds are not available; the  
142 50K SNP array used does not offer sufficient density to associate a given selection signature to a specific  
143 set of polymorphisms; finally, from the literature, it appears that coat color is a complex trait, with high  
144 genetic heterogeneity. In particular, mutations in different genes can give rise to the same phenotype  
145 (*e.g.* in Horse [18]). Also, within a gene different mutations can give rise to different phenotypes, *e.g.*  
146 mutations in the MC1R gene (also named the extensions locus) have been associated to a large panel  
147 of skin or coat colors [19–21]. Studying more precisely selection signatures related to coat color and the  
148 underlying selected mutations will likely require further sequencing experiments targeted at these genes.  
149 This in turn will help to understand the evolutionary history of the breeds and the effect of selection [22].  
150 To potentially help in this task, in table S2 we list, for each “color gene”, the populations that have likely  
151 been selected for.

152 **Morphology** Another group of genes that are found in selection signatures have known effects on  
153 body morphology and development. NPR2, HMGA2 and BMP2 were identified previously [4], but we

also found selection signatures around IGF1, ALX4 or EXT2, WNT5A and two Hox gene clusters (HOXA and HOXC). IGF1 has been shown to be a major determinant of small body size in dogs [23]. WNT5A and ALX4 are two genes involved in the development of the limbs and skeleton. ALX4 loss of function mutations cause polydactily in the mouse, through dysregulation of the sonic hedgehog (SHH) signaling factor [24,25]. Moreover, the ALX4 protein has been shown to bind proteins from the HOXA (HOXA11 and HOXA3) and HOXC (HOXC4 and HOXC5) clusters [26], both of which are found under selection signatures (see below). Located just besides ALX4 and corresponding to the same selection signature EXT2 is responsible for the development of exostose in the mouse [27]. Mutations in WNT5A are causing the dominant Human Robinow syndrome, *characterized by short stature, limb shortening, genital hypoplasia and craniofacial abnormalities* [28]. An ancestral selection signature is found near the ACAN gene, which expression was shown to be upregulated by BMP2 [29], another candidate gene for selection. Mutations in the ACAN gene have been shown to induce osteochondrosis [30] and skeletal dysplasia [31]. The ACAN region has also been shown to be associated with Human adult height [32].

Two selection signatures are localized close to *Hox* genes clusters. *Hox* genes are responsible for antero-posterior development and skeletal morphology along the anterior-posterior axis in vertebrates. One is a recent selection signature in the SWA group near the HOXA gene cluster and the other is an ancestral signature near the HOXC gene cluster, with a high differentiation of the ASI ancestor compared to AFR and SWA at the most significant SNP (OAR3\_141586525).

**Traits of agronomical importance** Sheeps have been raised for meat, milk and wool production. Under selection signatures, we found several genes associated with these production traits. Apart from the selection signature in Texels on the MSTN gene for increased muscularity [33], discussed in [10], selection on HDAC9 could also be linked to muscling. HDAC9 is a known transcriptional repressor of myogenesis. Its expression has been shown to be affected by the callypige mutation in the sheep at the DLK1-DIO3 locus [34]. The HDAC9 signal corresponds to a selection signature in the Garut breed from Indonesia, a breed used in ram fights. Two selection signatures contain genes shown to be underlying QTLs with large effects on milk production (yield and composition) in cattle: ABCG2 [16] and SREBP1 [35]. The SREBP1 gene is also found in a genome region associated with milk composition in the Lacaune breed (unpublished data). Also, one of the ancestral selection signatures lies close to the INSIG2 gene, in the SREBP1 signaling pathway and recently shown to be associated with milk fatty acid composition

183 in Holstein cattle [36]. Two selection signatures relate to wool characteristics, one in the CEU group  
184 near the FGF5 gene, partly responsible for hair type in the domestic dog [37], and an ancestral selection  
185 signature on chromosome 25 in a QTL region associated to wool quality traits in the sheep [38,39].

186 One of the strong outlying regions in the selection scan contains the PITX3 gene. Further analysis  
187 revealed that this signature was due to the German Texel population haplotype diversity differing from  
188 the other Texel samples (results not shown). It turns out that the German Texel sample consisted of  
189 a case/control study for microphthalmia [6], although the case/control status information in this sample  
190 is not given in the Sheep Hapmap dataset. The consequence of such a recruitment is to bias haplotype  
191 frequencies in the region associated with the disease, which provokes a very strong differentiation signal  
192 between the German Texel and the other Texel populations. This illustrates that our method for detecting  
193 selection has the potential to identify causal variants in case/control studies, while using haplotype  
194 information.

## 195 **Ancestral signatures of selection**

196 It is difficult to estimate how far back in time signatures of selection found in the ancestral tree appended.  
197 In particular, it would be interesting to place this population tree with respect to sheep domestication.  
198 Two genes lying close to ancestral selection signatures might indicate that the selection signatures cap-  
199 tured could be rather old. First, we found selection near the TRPM8 gene, which has been shown to be a  
200 major determinant of cold perception in the mouse [40]. The pattern of allele frequency at the significant  
201 SNP (OAR1\_6722309) is consistent with the climate in the geographical origins of the population groups.  
202 AFR, ASI and ITA, living in warm climates, have low frequency (0.04-0.16) of the A allele, while NEU  
203 and CEU, from colder regions, have higher frequencies (0.55-0.7), the SWE group having an intermediate  
204 frequency of 0.38. Overall, this selection signature might be due to an adaptation to cold climate through  
205 selection on a TRPM8 variant. Another selection signature lies close to a potential chicken domestication  
206 gene, TSHR [41], which signaling regulates photoperiodic control of reproduction [42]. This selection  
207 signature was identified before [4] and our analysis indicates that it happened in the ancestral population  
208 tree, consistent with an early selection event. Given its role, we can speculate that selection on TSHR  
209 gene is related to seasonality of reproduction. Under temperate climates, sheep experience a reproductive  
210 cycle under photoperiodic control. Furthermore, there is evidence that this control was altered during  
211 domestication [43] so our analysis suggests genetic mutations in TSHR may have contributed to this



212 alteration.

213 As discussed above, some of the genes found underlying ancestral selection signatures can be related  
214 to production or morphological traits (*e.g.* ASIP, INSIG2, ACAN, wool QTL), indicating that these traits  
215 have likely been important at the beginning of the sheep history. The other genes that we could identify  
216 as likely selection targets in the ancestral population tree relate to immune response (GATA3) and in  
217 particular to antirival response (TMEM154 [44], TRAF3 [45]). The most significant ancestral selection  
218 signature coincides with the NF1 gene, encoding neurofibromin. This gene is a negative regulator of  
219 the ras signal transduction pathway, therefore involved in cell proliferation and cancer, in particular  
220 neurofibromatosis. Due to this central role in intra-cellular signaling, mutations affecting this gene can  
221 have many phenotypic consequences so that its role in the adaptation of sheep breeds remains unclear.

## 222 Conclusions

223 We conducted a genome scan for selection in a large worldwide set of breeds from the Sheep Hapmap  
224 dataset. Using recently developed methods, we were able to detect a very large number of selection  
225 signatures in different geographical groups. We also found selection signatures that most likely predate  
226 the formation of contemporary breeds. This analysis reveals strong response of the genome diversity in  
227 sheep populations with respect to selection on morphology and color, and the influence of recent selection  
228 on production traits. We also pinpoint two strong candidate genes (TRPM8 and TSHR) most likely  
229 involved in selection response during the early history of domestic sheep.

230 Elucidating causal variation underlying these selection signatures will most likely require large scale  
231 sequencing projects, together with phenotypic characterization of individuals or populations. This study  
232 can help in targeting specific breeds and traits to be studied in priority in such projects.

## 233 Methods

234 **Selecting populations and animals** Seventy four breeds are represented in the Sheep HapMap data  
235 set, but we only used a subset of these breeds in our genome scan. We removed the breeds with small  
236 sample size (< 20 animals), for which haplotype diversity can not be determined with sufficient precision.  
237 Based on historical information, we also removed all breeds resulting from a recent admixture or having

experienced a severe recent bottleneck. Focusing on the remaining breeds, we then studied the genetic structure within each population group, in order to detect further admixture events. We performed a standardized PCA of individual based genotype data and applied the admixture software [12].

In two population groups (AFR and NEU) the different breeds were clearly separated into distinct clusters of the PCA and showed no evidence of recent admixture. These samples were left unchanged for the genome scan for selection. A similar pattern was observed in three other groups (ITA, SWA, ASI), except for a few outlier animals that had to be re-attributed to a different breed or simply removed (Figures S1, S2 and S3). In the two last groups (CEU and SWE), several admixed breeds were found and were consequently removed from the genome scan analysis (Figures S4 and S5).

We performed a genome scan within each group of populations listed in table S1, with a single SNP statistic FLK [9] and its haplotype version hapFLK [10].

**Population trees** Both statistics require estimating the population tree, with a procedure described in details in [9]. Briefly, we built a population tree for each group by first calculating Reynolds' distances between each population, and then applying the Neighbour Joining algorithm on the distance matrix. For each group, we rooted the tree using the Soay sheep as an outgroup. This breed has been isolated on an Island for many generations and exhibits a very strong differentiation with all the breeds of the Sheep hapmap dataset, making it well suited to be used as an outgroup.

**FLK and hapFLK genome scans** The FLK statistic was computed for each SNP within each group. The evolutionary model underlying the FLK statistic assumes that the mutation was present in the ancestral population. To consider only loci that most likely match this hypothesis, we restricted our analysis within each group to SNPs which estimated ancestral minor allele frequency  $p_0$  was above 5%. Under neutrality, the FLK statistic should follow a  $\chi^2$  distribution with  $n - 1$  degrees of freedom (DF), where  $n$  is the number of populations in the group. Overall, the fit of the theoretical distribution to the observed distribution was very good (supporting information Text S1) with the mean of the observed distribution ( $\overline{FLK}$ ) being very close to  $n - 1$  (table S4). Using  $\overline{FLK}$  as DF for the  $\chi^2$  distribution provided a better fit to the observed data than the  $n - 1$  theoretical value. We thus computed FLK p-values using the  $\chi^2(\overline{FLK})$  distribution. To compute the hapFLK statistic, we make use of the Scheet and Stephens LD model [46], a mixture model for haplotypes which requires specifying a number of haplotype clusters to be used. To choose this number, for each group, we used the fastPHASE cross-

validation based estimation of the optimal number of clusters. Results of this estimation are given in table S3. The LD model was estimated on unphased genotype data. The hapFLK statistic is computed as an average over 20 runs of the EM algorithm to fit the LD model. As in [10], we found that the hapFLK distribution could be modelled relatively well with a normal distribution (corresponding to non outlying regions) and a few outliers; we used robust estimation of the mean and standard deviation of the hapFLK statistic to eliminate the influence of outlying (*i.e.* potentially selected) regions. This procedure was done within each group, the resulting mean and standard deviation obtained are given in table S3. Finally, we computed at each SNP a p-value for the null hypothesis from the normal distribution.

**Selection in ancestral groups** The within-group FLK analysis provides for each SNP an estimation of the allele frequency  $p_0$  in the population ancestral to all populations of the group. We used this information to test SNP for selection using between groups differentiation, with some adjustments. First, the FLK model assumes tested polymorphisms are present in the ancestral population. SNPs for which the alternate allele has been seen in only one population group are likely to have appeared after divergence (within the ancestral tree) and were therefore removed of the analysis. Second, regions selected within groups affect allele frequency in some breeds and therefore bias our estimation of the ancestral allele frequency in this group. We therefore removed all SNPs that were included in within-group selection signatures. Finally, the FLK test requires a rooted population tree. For the within group analysis, we could use a very distant population to the current breeds (the Soay sheep). For the ancestral tree, we created an outgroup homozygous for ancestral alleles at all SNPs.

**Identifying selected regions and candidate genes** We defined significant regions for each statistic and within each group of populations. Using the neutral distribution ( $\chi^2$  for FLK and Normal for hapFLK), we computed the p-value of each statistic at each SNP. To identify selected regions, we estimated their q-value [47] to control the FDR. For FLK, we called significant SNPs with q-values less than 0.1 (therefore controlling the FDR at the 10% level). As the power of hapFLK is greater than that of FLK [10], we used an FDR threshold of 5%. For the FLK analysis in ancestral populations, we used an FDR threshold of 5%.

We then aimed at identifying genes that seem good candidates for explaining selection signatures. We proceeded differently for the single SNP FLK and hapFLK. For FLK, we considered that significant SNP less than 500Kb apart were capturing the same selection signal. Then, we considered as

potential candidate genes any gene that lie less than 500Kb of any significant SNP. For hapFLK, the genome signal is much more continuous than single SNP tests, because the statistic captures multi-point LD with the selected mutations. A consequence is that the significant regions can span large chromosome intervals. To restrict the list of potential candidate genes, and target only the ones closest to the most significant SNP, we restricted our search to the part of the signal where the difference in hapFLK value with the most significant SNP was less than  $0.5\sigma$ . This allowed to take into consideration the profile of the hapFLK signal, *i.e.* if the profile resembles a plateau, the candidate region will be rather broad while very sharp hapFLK peaks will provide a narrower candidate region. We listed all the genes present in the significant regions using the OAR3.1 genome browser at <http://www.livestockgenomics.csiro.au/cgi-bin/gbrowse/oarv3.1/>.

Some very likely candidate genes for selection were found in many of the significant regions. This is for example the case of the MSTN (GDF8) gene on chromosome 2 in the NEU group. In these cases, we did not list any other candidates in the region, *i.e.* we made a strong prior assumption of selection for these genes. Note however that we provide the position of the selected regions for the reader interested in knowing all the genes present in significant regions.

## Acknowledgments

The ovine SNP50 HapMap data set used for the analyses described was provided by the International Sheep Genomics Consortium (ISGC) and obtained from <http://www.sheephapmap.org> in agreement with the ISGC Terms of Access. Data analyses were performed on the computer cluster of the bioinformatics platform Toulouse Midi-Pyrenees.

## References

1. Andersson L (2012) How selective sweeps in domestic animals provide new insight into biological mechanisms. *J Intern Med* 271: 1-14.
2. Moradi MH, Nejati-Javaremi A, Moradi-Shahrababak M, Dodds KG, McEwan JC (2012) Genomic scan of selective sweeps in thin and fat tail sheep breeds for identifying of candidate regions associated with fat deposition. *BMC Genet* 13: 10.

- 322 3. Kijas JW, Townley D, Dalrymple BP, Heaton MP, Maddox JF, et al. (2009) A genome wide survey  
323 of SNP variation reveals the genetic structure of sheep breeds. PLoS One 4: e4668.
- 324 4. Kijas JW, Lenstra JA, Hayes B, Boitard S, Porto Neto LR, et al. (2012) Genome-wide analysis of  
325 the world's sheep breeds reveals high levels of historic mixture and strong recent selection. PLoS  
326 Biol 10: e1001258.
- 327 5. Garcia-Gómez E, Reverter A, Whan V, McWilliam SM, Arranz JJA, et al. (2011) Using regulatory  
328 and epistatic networks to extend the findings of a genome scan: identifying the gene drivers of  
329 pigmentation in merino sheep. PLoS ONE 6: e21158.
- 330 6. Becker D, Tetens J, Brunner A, Burstel D, Ganter M, et al. (2010) Microphthalmia in Texel sheep  
331 is associated with a missense mutation in the paired-like homeodomain 3 (PITX3) gene. PLoS One  
332 5: e8689.
- 333 7. Zhang L, Mousel MR, Wu X, Michal JJ, Zhou X, et al. (2013) Genome-Wide Genetic Diversity  
334 and Differentially Selected Regions among Suffolk, Rambouillet, Columbia, Polypay, and Targhee  
335 Sheep. PLoS One 8: e65942.
- 336 8. Excoffier L, Hofer T, Foll M (2009) Detecting loci under selection in a hierarchically structured  
337 population. Heredity (Edinb) 103: 285-98.
- 338 9. Bonhomme M, Chevalet C, Servin B, Boitard S, Abdallah J, et al. (2010) Detecting selection in  
339 population trees: the Lewontin and Krakauer test extended. Genetics 186: 241-62.
- 340 10. Fariello MI, Boitard S, Naya H, SanCristobal M, Servin B (2013) Detecting signatures of selection  
341 through haplotype differentiation among hierarchically structured populations. Genetics 193: 929-  
342 41.
- 343 11. Pritchard JK, Stephens M, Donnelly P (2000) Inference of population structure using multilocus  
344 genotype data. Genetics 155: 945-59.
- 345 12. Alexander DH, Novembre J, Lange K (2009) Fast model-based estimation of ancestry in unrelated  
346 individuals. Genome Res 19: 1655-64.

- 347 13. Johnston SE, McEwan JC, Pickering NK, Kijas JW, Beraldi D, et al. (2011) Genome-wide associ-  
 348 ation mapping identifies the genetic basis of discrete and quantitative variation in sexual weaponry  
 349 in a wild sheep population. *Mol Ecol* 20: 2555-66.
- 350 14. Dominik S, Henshall JM, Hayes BJ (2012) A single nucleotide polymorphism on chromosome 10 is  
 351 highly predictive for the polled phenotype in Australian Merino sheep. *Anim Genet* 43: 468-70.
- 352 15. Akey JM, Ruhe AL, Akey DT, Wong AK, Connelly CF, et al. (2010) Tracking footprints of artificial  
 353 selection in the dog genome. *Proc Natl Acad Sci U S A* 107: 1160-5.
- 354 16. Cohen-Zinder M, Seroussi E, Larkin DM, Loo JJ, Everts-van der Wind A, et al. (2005) Identi-  
 355 fication of a missense mutation in the bovine ABCG2 gene with a major effect on the QTL on  
 356 chromosome 6 affecting milk yield and composition in Holstein cattle. *Genome Res* 15: 936-44.
- 357 17. Jacobs LC, Wollstein A, Lao O, Hofman A, Klaver CC, et al. (2013) Comprehensive candidate  
 358 gene study highlights UGT1A and BNC2 as new genes determining continuous skin color variation  
 359 in Europeans. *Hum Genet* 132: 147-58.
- 360 18. Hauswirth R, Haase B, Blatter M, Brooks Sa, Burger D, et al. (2012) Mutations in MITF and  
 361 PAX3 cause "splashed white" and other white spotting phenotypes in horses. *PLoS genetics* 8:  
 362 e1002653.
- 363 19. Lin JY, Fisher DE (2007) Melanocyte biology and skin pigmentation. *Nature* 445: 843-50.
- 364 20. Klungland H, Våge DI, Gomez-Raya L, Adalsteinsson S, Lien S (1995) The role of melanocyte-  
 365 stimulating hormone (MSH) receptor in bovine coat color determination. *Mammalian genome* 6:  
 366 636-9.
- 367 21. Joerg H, Fries HR, Meijerink E, Stranzinger GF (1996) Red coat color in Holstein cattle is associ-  
 368 ated with a deletion in the MSHR gene. *Mammalian genome* 7: 317-8.
- 369 22. Linnen CR, Poh YP, Peterson BK, Barrett RDH, Larson JG, et al. (2013) Adaptive evolution of  
 370 multiple traits through multiple mutations at a single gene. *Science* 339: 1312-6.
- 371 23. Sutter NB, Bustamante CD, Chase K, Gray MM, Zhao K, et al. (2007) A single IGF1 allele is a  
 372 major determinant of small size in dogs. *Science* 316: 112-5.

- 373 24. Kuijper S, Feitsma H, Sheth R, Korving J, Reijnen M, et al. (2005) Function and regulation of  
374 Alx4 in limb development: complex genetic interactions with Gli3 and Shh. *Developmental biology*  
375 285: 533–44.
- 376 25. Qu S, Tucker SC, Ehrlich JS, Levorse JM, Flaherty LA, et al. (1998) Mutations in mouse *Aristaless-*  
377 *like4* cause Strong's luxoid polydactyly. *Development* 125: 2711–21.
- 378 26. Ravasi T, Suzuki H, Cannistraci CV, Katayama S, Bajic VB, et al. (2010) An atlas of combinatorial  
379 transcriptional regulation in mouse and man. *Cell* 140: 744 - 752.
- 380 27. Stickens D, Zak BM, Rougier N, Esko JD, Werb Z (2005) Mice deficient in *Ext2* lack heparan  
381 sulfate and develop exostoses. *Development* 132: 5055–68.
- 382 28. Person AD, Beiraghi S, Sieben CM, Hermanson S, Neumann AN, et al. (2010) WNT5A mutations  
383 in patients with autosomal dominant Robinow syndrome. *Developmental dynamics* 239: 327–37.
- 384 29. Noguchi Ki, Watanabe Y, Fuse T, Takizawa M (2010) A new chondrogenic differentiation initiator  
385 with the ability to up-regulate sox trio expression. *Journal of Pharmacological Sciences* 112: 89–97.
- 386 30. Stattin EL, Wiklund F, Lindblom K, Onnerfjord P, Jonsson BA, et al. (2010) A missense mutation  
387 in the aggrecan C-type lectin domain disrupts extracellular matrix interactions and causes dominant  
388 familial osteochondritis dissecans. *American journal of human genetics* 86: 126–37.
- 389 31. Thompson SW, Merriman B, Funari Va, Fresquet M, Lachman RS, et al. (2009) A recessive skeletal  
390 dysplasia, SEMD aggrecan type, results from a missense mutation affecting the C-type lectin  
391 domain of aggrecan. *American journal of human genetics* 84: 72–9.
- 392 32. Weedon MN, Lango H, Lindgren CM, Wallace C, Evans DM, et al. (2008) Genome-wide association  
393 analysis identifies 20 loci that influence adult height. *Nature genetics* 40: 575–83.
- 394 33. Clop A, Marcq F, Takeda H, Pirottin D, Tordoir X, et al. (2006) A mutation creating a potential  
395 illegitimate microRNA target site in the myostatin gene affects muscularity in sheep. *Nat Genet*  
396 38: 813–8.
- 397 34. Fleming-Waddell JN, Olbricht GR, Taxis TM, White JD, Vuocolo T, et al. (2009) Effect of *DLK1*  
398 and *RTL1* but not *MEG3* or *MEG8* on muscle gene expression in Callipyge lambs. *PloS one* 4:  
399 e7399.

- 400 35. Bouwman AC, Bovenhuis H, Visker MH, van Arendonk JA (2011) Genome-wide association of  
401 milk fatty acids in Dutch dairy cattle. BMC Genet 12: 43.
- 402 36. Rincon G, Islas-Trejo A, Castillo AR, Bauman DE, German BJ, et al. (2012) Polymorphisms in  
403 genes in the SREBP1 signalling pathway and SCD are associated with milk fatty acid composition  
404 in Holstein cattle. J Dairy Res 79: 66-75.
- 405 37. Cadieu E, Neff MW, Quignon P, Walsh K, Chase K, et al. (2009) Coat variation in the domestic  
406 dog is governed by variants in three genes. Science 326: 150-3.
- 407 38. Ponz R, Moreno C, Allain D, Elsen JM, Lantier F, et al. (2001) Assessment of genetic variation  
408 explained by markers for wool traits in sheep via a segment mapping approach. Mamm Genome  
409 12: 569-72.
- 410 39. Bidinost F, Roldan D, Dodero A, Cano E, Taddeo H, et al. (2007) Wool quantitative trait loci in  
411 merino sheep. Small Ruminant Research 74: 113 - 118.
- 412 40. Bautista DM, Siemens J, Glazer JM, Tsuruda PR, Basbaum AI, et al. (2007) The menthol receptor  
413 TRPM8 is the principal detector of environmental cold. Nature 448: 204-8.
- 414 41. Rubin CJ, Zody MC, Eriksson J, Meadows JRS, Sherwood E, et al. (2010) Whole-genome resequencing reveals loci under selection during chicken domestication. Nature 464: 587-91.
- 415 42. Nakao N, Ono H, Yamamura T, Anraku T, Takagi T, et al. (2008) Thyrotrophin in the pars  
416 tuberalis triggers photoperiodic response. Nature 452: 317-22.
- 417 43. Balasse M, Tresset A (2007) Environmental constraints on the reproductive activity of domestic  
418 sheep and cattle : what latitude for the herder ? Anthropolozologica 42: 71-88.
- 419 44. Heaton MP, Clawson ML, Chitko-Mckown CG, Leymaster Ka, Smith TPL, et al. (2012) Reduced  
420 lentivirus susceptibility in sheep with TMEM154 mutations. PLoS genetics 8: e1002467.
- 421 45. Oganessian G, Saha SK, Guo B, He JQ, Shahangian A, et al. (2006) Critical role of TRAF3 in the  
422 Toll-like receptor-dependent and -independent antiviral response. Nature 439: 208-11.
- 423 46. Scheet P, Stephens M (2006) A fast and flexible statistical model for large-scale population genotype  
424 data: applications to inferring missing genotypes and haplotypic phase. Am J Hum Genet 78: 629-  
425 44.
- 426



- 427 47. Storey JD, Tibshirani R (2003) Statistical significance for genomewide studies. Proc Natl Acad  
428 Sci U S A 100: 9440-5.

## 429 **Figures Legends**

**Figure 1.** Localisation of selection signatures identified in 7 groups of populations. Candidate genes are indicated above their genomic localisation. Only chromosomes harboring selection signatures are plotted.

**Figure 2.** Phylogenetic tree of the ancestral populations of geographical groups.

**Figure 3.** Genome scan for selection signature in ancestral populations of the geographical groups. Significant SNPs at the 5% FDR level are plotted in darker color.

## Tables

**Table 1. List of genome regions corresponding to selection signatures.** Regions identified with the hapFLK and FLK test, with the corresponding population group and most differentiated populations (except for the AFR group). Overlapping regions in different groups or with different tests are grouped by background color. †: signatures of selection previously identified [4]. ‡: this outlying region is not due to evolutionary processes (see details in the main text). Full names of groups and populations are given in Table S1.

| OAR | Begin (Mbp) | End (Mbp) | P-value | Q-value | Group | Test   | Cand.<br>gene | Diff. pop.        |
|-----|-------------|-----------|---------|---------|-------|--------|---------------|-------------------|
| 2   | 46.65       | 57.99     | 6.3e-10 | 7.1e-07 | ITA   | hapFLK | NPR2†         | COM               |
| 2   | 51.41       | 53.44     | 4.1e-09 | 1.6e-04 | ITA   | FLK    |               | COM               |
| 2   | 74          | 74.86     | 7.4e-04 | 3.7e-02 | ITA   | hapFLK |               | COM               |
| 2   | 81.27       | 87.32     | 4.1e-09 | 2.3e-06 | ITA   | hapFLK | BNC2          | COM               |
| 2   | 110.08      | 112.08    | 1.5e-05 | 6.7e-02 | ASI   | FLK    |               | SUM TIB<br>GUR    |
| 2   | 113.36      | 122.24    | 7.0e-06 | 3.3e-03 | NEU   | hapFLK | MSTN†         | GTX<br>NTX<br>STX |
| 2   | 239.76      | 241.76    | 2.9e-05 | 9.3e-02 | SWA   | FLK    | RH locus      | AFS               |
| 3   | 84.4        | 86.4      | 2.5e-05 | 9.1e-02 | ASI   | FLK    |               | –                 |
| 3   | 120.91      | 125.49    | 5.3e-04 | 3.0e-02 | ITA   | hapFLK | KITLG         | COM               |
| 3   | 122.07      | 130.85    | 6.8e-08 | 4.2e-04 | AFR   | hapFLK |               |                   |
| 3   | 151.42      | 156.93    | 3.3e-16 | 3.1e-12 | ITA   | hapFLK | HMGA2‡        | COM<br>SAB        |
| 3   | 154.79      | 154.93    | 5.9e-04 | 4.3e-02 | AFR   | hapFLK |               |                   |
| 3   | 159.64      | 161.6     | 6.1e-04 | 3.3e-02 | ITA   | hapFLK |               | COM               |
| 3   | 167.85      | 171.67    | 1.5e-04 | 1.3e-02 | ITA   | hapFLK | IGF1          | COM<br>ALT<br>SAB |
| 4   | 4.61        | 6.61      | 5.3e-06 | 2.1e-02 | SWA   | FLK    |               | MOG               |

Table 1 – continued from previous page

|   |       |       |         |         |     |        |        |           |
|---|-------|-------|---------|---------|-----|--------|--------|-----------|
| 4 | 8.5   | 19.66 | 4.2e-06 | 1.1e-03 | CEU | hapFLK |        | VBS       |
|   |       |       |         |         |     |        |        | VRS       |
| 4 | 15.11 | 17.11 | 8.4e-07 | 1.5e-02 | CEU | FLK    |        | VBS       |
| 4 | 26.46 | 28.46 | 2.4e-05 | 9.1e-02 | ASI | FLK    | HDAC9  | GUR       |
|   |       |       |         |         |     |        |        | IDC       |
|   |       |       |         |         |     |        |        | SUM       |
| 4 | 44.49 | 45.76 | 2.7e-04 | 3.4e-02 | NEU | hapFLK |        | NZR       |
| 4 | 45.57 | 47.57 | 1.8e-06 | 2.4e-02 | ASI | FLK    |        | SUM       |
| 4 | 67.75 | 69.8  | 3.5e-07 | 2.3e-03 | SWA | FLK    | HOXA   | MOG       |
| 5 | 29.4  | 31.4  | 1.1e-05 | 6.7e-02 | ASI | FLK    |        | GAR       |
| 5 | 47.35 | 49.35 | 1.4e-05 | 6.7e-02 | ASI | FLK    |        | BGA       |
| 5 | 78.16 | 78.76 | 4.2e-04 | 4.2e-02 | NEU | hapFLK |        | NZT       |
| 6 | 5.62  | 7.62  | 3.1e-06 | 6.0e-02 | ITA | FLK    |        | SAB       |
| 6 | 33.22 | 41.02 | 3.4e-08 | 8.0e-05 | SWE | hapFLK | ABCG2† | LAC       |
|   |       |       |         |         |     |        |        | LAM       |
| 6 | 34.71 | 39.12 | 1.6e-07 | 4.1e-05 | ITA | hapFLK |        | COM       |
| 6 | 35.94 | 38.31 | 2.1e-04 | 1.9e-02 | CEU | hapFLK |        | VRS       |
|   |       |       |         |         |     |        |        | VBS       |
| 6 | 67.98 | 70.36 | 4.3e-06 | 1.1e-03 | CEU | hapFLK | KIT†   | VBS       |
| 6 | 68.9  | 70.95 | 9.6e-07 | 5.3e-03 | SWA | FLK    |        |           |
| 6 | 93.3  | 94.39 | 3.8e-04 | 2.7e-02 | CEU | hapFLK | FGF5†  | (VRS&VBS) |
|   |       |       |         |         |     |        |        | or        |
|   |       |       |         |         |     |        |        | (ERS&BOS) |
| 7 | 49.15 | 51.15 | 1.1e-05 | 9.7e-02 | CEU | FLK    |        | VRS       |
| 7 | 78.31 | 80.31 | 8.1e-07 | 1.5e-02 | CEU | FLK    |        | VRS ERS   |
| 8 | 23.97 | 25.97 | 2.9e-05 | 9.6e-02 | ASI | FLK    |        | TIB       |
| 9 | 29.46 | 31.55 | 3.7e-04 | 3.4e-02 | SWE | hapFLK |        | CHU       |
|   |       |       |         |         |     |        |        | MER       |
| 9 | 37.79 | 46.03 | 1.9e-05 | 6.2e-03 | NEU | hapFLK |        | NZT ISF   |

Table 1 – continued from previous page

|    |       |       |         |         |     |        |              |                |
|----|-------|-------|---------|---------|-----|--------|--------------|----------------|
| 10 | 24.02 | 34.91 | 1.4e-14 | 1.1e-10 | CEU | hapFLK | RXFP2†       | BOS ERS<br>VRS |
| 10 | 29.42 | 29.71 | 9.6e-04 | 4.4e-02 | ITA | hapFLK |              | COM<br>ALT     |
| 10 | 28.5  | 30.5  | 6.3e-06 | 7.5e-02 | CEU | FLK    |              | BOS ERS        |
| 10 | 28.5  | 30.5  | 3.2e-05 | 9.7e-02 | SWA | FLK    |              | NDZ            |
| 10 | 28.5  | 30.5  | 1.3e-06 | 5.4e-02 | SWE | FLK    |              | MER            |
| 10 | 48.9  | 49.59 | 5.2e-04 | 3.1e-02 | CEU | hapFLK |              | –              |
| 11 | 12.55 | 14.12 | 1.4e-04 | 2.2e-02 | NEU | hapFLK |              |                |
| 11 | 24.18 | 38.74 | 9.8e-09 | 8.0e-05 | SWE | hapFLK | SREBP1       | LAC<br>MER     |
| 11 | 40.31 | 46.7  | 3.3e-06 | 5.5e-04 | ITA | hapFLK |              | SAB            |
| 12 | 42.66 | 44.66 | 3.4e-07 | 7.6e-03 | ASI | FLK    |              | SUM            |
| 13 | 33.1  | 40.02 | 5.7e-06 | 1.8e-03 | AFR | hapFLK | PCSK2        |                |
| 13 | 40.6  | 50.3  | 4.9e-07 | 4.9e-04 | AFR | hapFLK | BMP2†        |                |
| 13 | 43.34 | 51.28 | 2.7e-07 | 1.7e-04 | SWE | hapFLK | PRNP         | LAC<br>LAM     |
| 13 | 56.11 | 57.17 | 2.5e-08 | 4.8e-04 | SWA | hapFLK | EDN3         | MOG            |
| 13 | 55.33 | 57.43 | 8.4e-11 | 1.1e-06 | SWA | FLK    |              | MOG            |
| 14 | 6.37  | 13.6  | 1.6e-04 | 1.4e-02 | ITA | hapFLK |              | SAB            |
| 14 | 13.64 | 13.7  | 5.3e-04 | 4.9e-02 | NEU | hapFLK | MC1R         | ISF            |
| 14 | 13.7  | 16.46 | 1.2e-04 | 1.1e-02 | ITA | hapFLK |              | SAB            |
| 14 | 45.49 | 50.09 | 1.6e-04 | 2.5e-02 | NEU | hapFLK | TGFB1        | NTX<br>NZR     |
| 15 | 48.87 | 50.87 | 1.5e-05 | 6.7e-02 | ASI | FLK    |              | GAR<br>IDC     |
| 15 | 71.71 | 73.71 | 3.8e-06 | 1.6e-02 | SWA | FLK    | ALX4<br>EXT2 | MOG            |

Table 1 – continued from previous page

|    |       |       |         |         |     |        |              |                   |
|----|-------|-------|---------|---------|-----|--------|--------------|-------------------|
| 16 | 33.2  | 35.1  | 1.8e-04 | 1.8e-02 | AFR | hapFLK | C6/C7        |                   |
| 16 | 63.97 | 65.97 | 1.1e-05 | 6.7e-02 | ASI | FLK    |              | GAR<br>IDC        |
| 19 | 4.42  | 7.43  | 2.2e-04 | 1.9e-02 | CEU | hapFLK | GLB1†        | VRS<br>BOS        |
| 19 | 30.42 | 35.09 | 3.2e-05 | 4.2e-03 | CEU | hapFLK | MITF†        | VBS<br>BOS<br>ERS |
| 19 | 44.6  | 46.6  | 3.9e-06 | 3.9e-02 | ASI | FLK    | WNT5A        | GAR<br>BGA        |
| 20 | 36.74 | 38.52 | 2.8e-04 | 2.3e-02 | CEU | hapFLK |              | VRS               |
| 22 | 18.9  | 24.36 | 1.5e-11 | 7.4e-08 | NEU | hapFLK | PITX3‡       | GTX               |
| 23 | 42.5  | 46.96 | 2.2e-05 | 5.4e-03 | AFR | hapFLK | MC5R<br>MC2R |                   |
| 23 | 54.14 | 56.14 | 3.8e-07 | 7.6e-03 | ASI | FLK    |              | GAR               |
| 25 | 0.08  | 3.08  | 3.7e-04 | 2.4e-02 | ITA | hapFLK |              | SAB               |

| chr | pos       | Estimated ancestral allele frequencies |      |      |      |      |      |      | P-value | Q-value | candidate gene |
|-----|-----------|----------------------------------------|------|------|------|------|------|------|---------|---------|----------------|
|     |           | AFR                                    | ASI  | SWA  | NEU  | CEU  | ITA  | SWE  |         |         |                |
| 1   | 7192190   | 0.15                                   | 0.08 | 0.16 | 0.55 | 0.69 | 0.04 | 0.38 | 1.7e-06 | 5.3e-03 | TRPM8          |
| 1   | 237070498 | 0.87                                   | 0.95 | 0.91 | 0.48 | 0.24 | 0.77 | 0.35 | 1.4e-05 | 2.5e-02 | GYG1           |
| 1   | 239424807 | 0.46                                   | 0.68 | 0.06 | 0.21 | 0.15 | 0.11 | 0.17 | 3.4e-05 | 4.8e-02 |                |
| 1   | 239491620 | 0.53                                   | 0.41 | 0.94 | 0.86 | 0.93 | 0.93 | 0.88 | 4.3e-05 | 5.6e-02 |                |
| 2   | 45500785  | 0.43                                   | 0.91 | 0.23 | 0.76 | 0.87 | 0.87 | 0.93 | 2.2e-06 | 6.4e-03 | LPL            |
| 2   | 182607165 | 0.99                                   | 0.97 | 0.18 | 0.64 | 0.73 | 0.83 | 0.64 | 3.4e-08 | 1.8e-04 | INSIG2         |
| 2   | 182672296 | 0.99                                   | 0.94 | 0.32 | 0.9  | 0.86 | 0.89 | 0.81 | 7.7e-07 | 2.8e-03 |                |
| 2   | 192231314 | 0.59                                   | 0.93 | 0.36 | 0.96 | 0.89 | 0.81 | 0.95 | 1.6e-05 | 2.8e-02 |                |
| 3   | 132478420 | 0.24                                   | 0.89 | 0.18 | 0.93 | 0.81 | 0.84 | 0.82 | 1.2e-06 | 3.9e-03 | HOXC †         |
| 3   | 180860403 | 0.71                                   | 0.53 | 0.28 | 0.82 | 0.31 | 0.12 | 0.13 | 1.7e-05 | 2.8e-02 |                |
| 5   | 15522700  | 0.68                                   | 0.63 | 0.92 | 0.27 | 0.76 | 0.99 | 0.78 | 9.8e-06 | 2.0e-02 |                |
| 7   | 89519883  | 0.63                                   | 0.61 | 0.19 | 0.89 | 0.18 | 0.6  | 0.95 | 6.1e-10 | 5.2e-06 | TSHR †         |
| 8   | 31748642  | 0.84                                   | 0.93 | 0.94 | 0.16 | 0.63 | 0.47 | 0.19 | 2.8e-05 | 4.1e-02 | PREP/BVES †    |
| 11  | 18248852  | 0.35                                   | 0.32 | 0.82 | 0.64 | 0.94 | 0.96 | 0.92 | 1.3e-05 | 2.5e-02 | NF1 †          |
| 11  | 18325488  | 0.87                                   | 0.93 | 0    | 0.35 | 0.04 | 0.03 | 0.04 | 3.3e-16 | 7.2e-12 |                |
| 11  | 18335747  | 0.87                                   | 0.93 | 0    | 0.35 | 0.04 | 0.03 | 0.04 | 3.3e-16 | 7.2e-12 |                |
| 11  | 18433474  | 0.87                                   | 0.93 | 0.02 | 0.35 | 0.07 | 0.02 | 0.05 | 3.8e-15 | 5.4e-11 |                |
| 11  | 18440783  | 0.78                                   | 0.93 | 0.02 | 0.34 | 0.07 | 0.02 | 0.05 | 2.0e-14 | 2.2e-10 |                |
| 11  | 25704651  | 0.97                                   | 0.96 | 0.97 | 0.42 | 0.94 | 0.94 | 0.96 | 8.5e-06 | 1.9e-02 |                |
| 11  | 26284826  | 0.99                                   | 0.97 | 0.94 | 0.38 | 0.93 | 0.95 | 0.79 | 3.2e-05 | 4.6e-02 |                |
| 11  | 26571629  | 0.92                                   | 0.94 | 0.98 | 0.29 | 0.89 | 0.88 | 0.86 | 1.8e-05 | 2.8e-02 |                |
| 11  | 26872280  | 0.78                                   | 0.71 | 0.93 | 0.15 | 0.89 | 0.9  | 0.9  | 2.2e-07 | 9.5e-04 |                |
| 13  | 12120674  | 0.29                                   | 0.84 | 0.97 | 0.91 | 0.97 | 0.92 | 0.84 | 7.7e-06 | 1.8e-02 | GATA3          |
| 13  | 62857560  | 0.52                                   | 0.62 | 0.65 | 0.98 | 0.67 | 0.92 | 0.36 | 3.6e-06 | 9.7e-03 | ASIP †         |
| 15  | 3706790   | 0.71                                   | 0.22 | 0.96 | 0.28 | 0.27 | 0.34 | 0.21 | 6.8e-06 | 1.7e-02 |                |
| 15  | 29856310  | 0.98                                   | 0.99 | 0.99 | 0.47 | 0.92 | 0.95 | 0.96 | 9.8e-06 | 2.0e-02 |                |
| 16  | 38696505  | 0.95                                   | 0.98 | 0.95 | 0.99 | 0.68 | 0.31 | 0.3  | 6.8e-07 | 2.7e-03 | PRLR †         |
| 17  | 4867509   | 0.91                                   | 0.95 | 0.85 | 0.54 | 0.18 | 0.58 | 0.17 | 1.8e-05 | 2.8e-02 | TMEM154        |
| 18  | 19342316  | 0.9                                    | 0.79 | 0.67 | 0.35 | 0.75 | 0.1  | 0.09 | 1.9e-07 | 9.3e-04 | ACAN †         |
| 18  | 66470371  | 0.99                                   | 0.97 | 0.9  | 0.9  | 0.18 | 0.04 | 0.08 | 1.9e-09 | 1.3e-05 | TRAF3          |
| 20  | 17381047  | 0.24                                   | 0.61 | 0.97 | 0.98 | 0.93 | 0.99 | 0.91 | 3.1e-08 | 1.8e-04 | VEGFA †        |
| 25  | 7517270   | 0.95                                   | 0.94 | 0.93 | 0.14 | 0.27 | 0.57 | 0.19 | 1.8e-05 | 2.8e-02 | wool QTL †     |

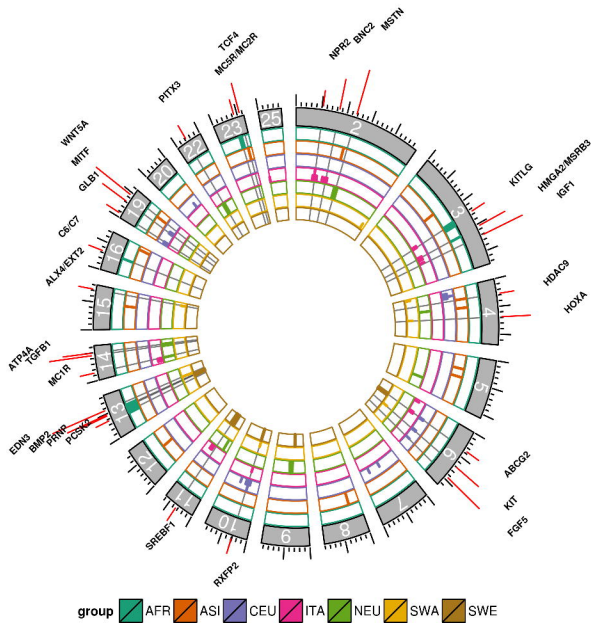



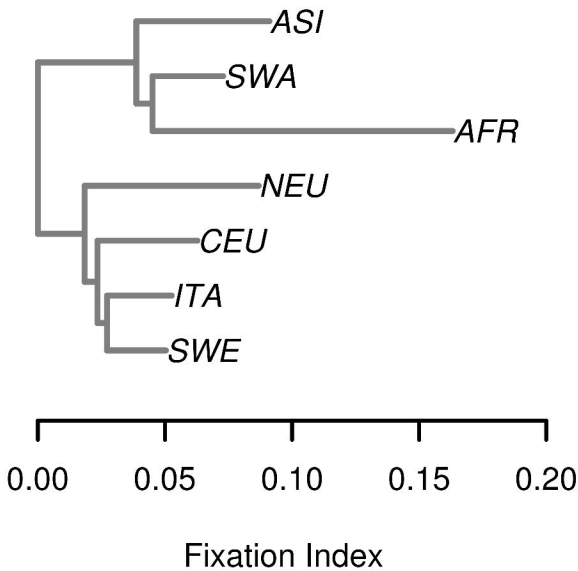

$-\log_{10}(\text{p-value})$

15  
10  
5  
0

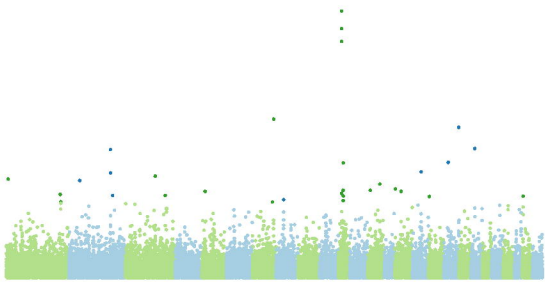

Source: https://www.biorxiv.org/content/10.1101/001453v1.full.pdf
